# Supplementary material for: Coping Capacity, Adaptive Capacity, and Transformative Capacity Preliminary Characterization in a “Multi-Hazard” Resilience Perspective: The Soccavo District Case Study (City of Naples, Italy)
Source: MDPI journal article supplement (doi:10.3390/su151410877), 2023-07-11
Supplement: s1 [file s1]

Archive with 1 entries (1 files):
- sustainability-2473701-supplementary.pdf
